# Supplementary material
Source: PubMed Central journal article supplement (PMC6478552)
Supplement: NIHMS1523608-supplement-1.pdf [file NIHMS1523608-supplement-1.pdf]

Supplementary figure 1

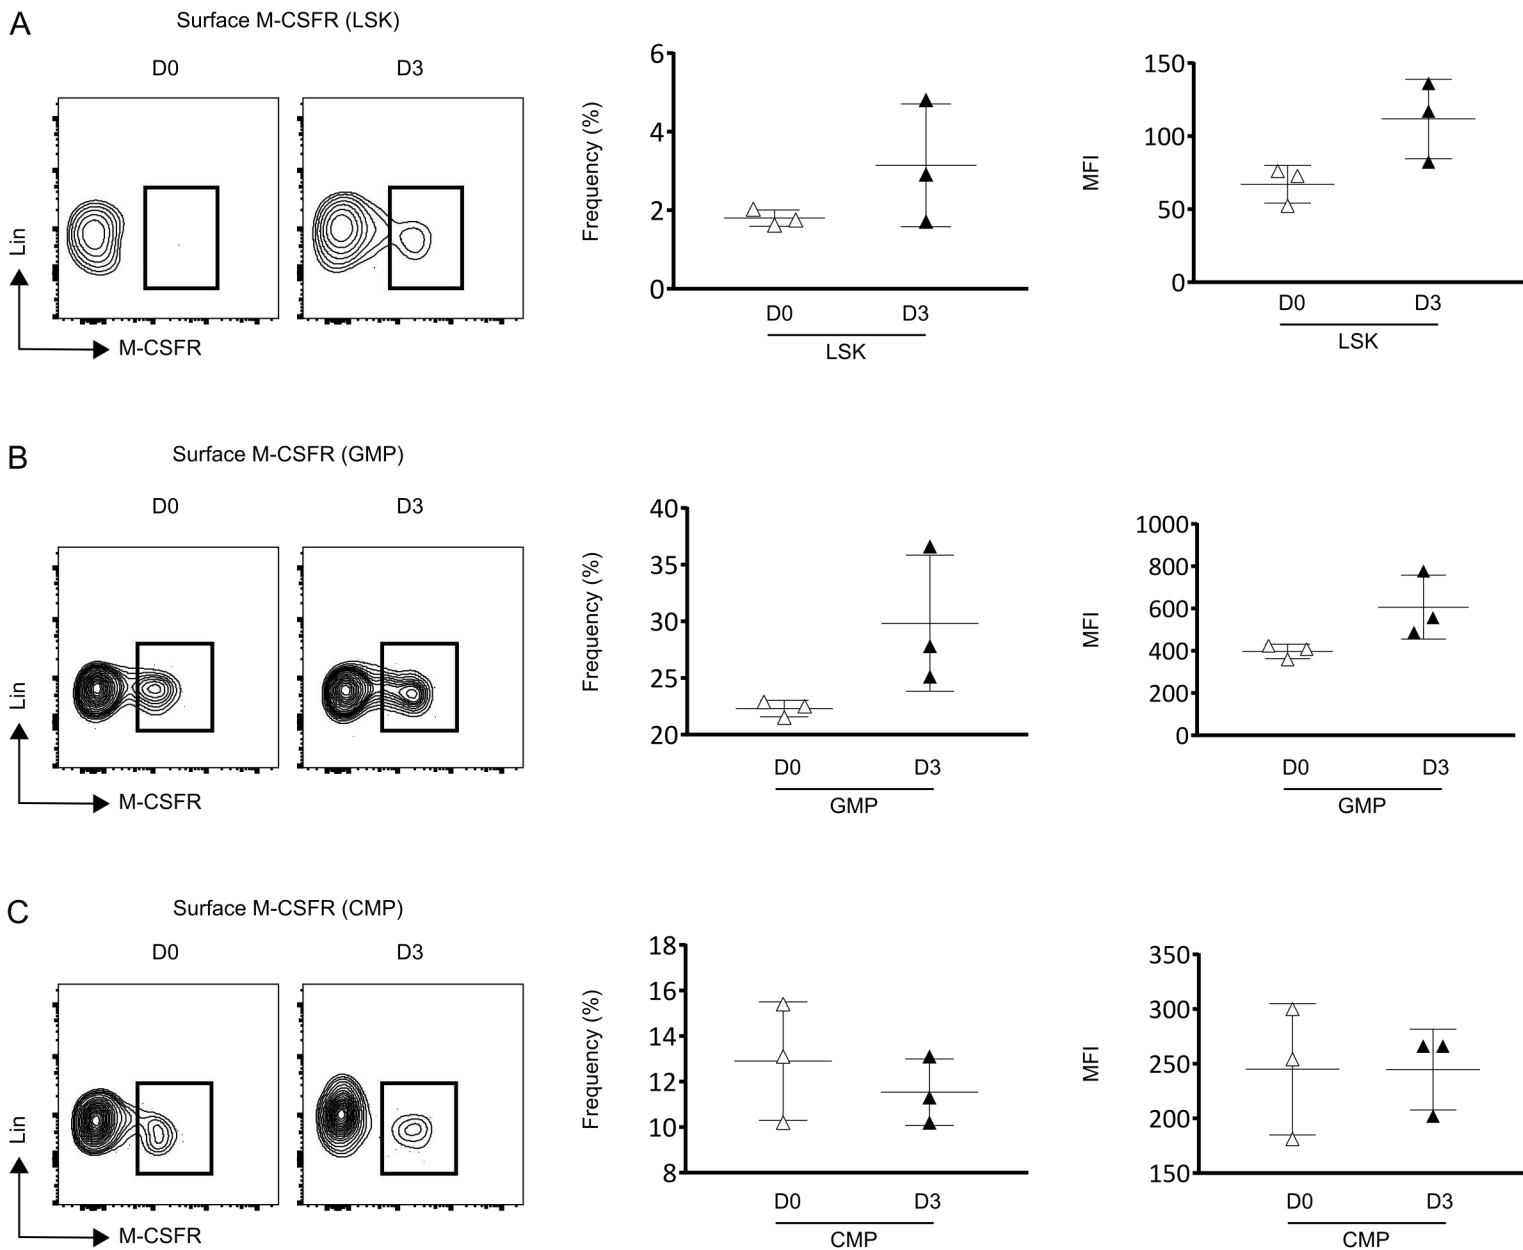

Supplementary figure 1. Surface M-CSFR on HSPC post skin wounding. Representative flow cytograms (left panels) and percentage and mean fluorescence intensity (MFI) (right panels) of M-CSFR on LSK (A), GMP (B) and CMP (C) in WT BM before wounding (D0) and at day 3 post wounding (D3). Results are represented as mean  $\pm$  SD, n=3 mice for each strain at each time points.
